# Supplementary material for: Synthesis and antimitotic activity of 2-phenyl-6-pyridinyl-2H-pyrazolo[4,3-c]pyridines
Source: Royal Society of Chemistry journal article supplement (doi:10.1039/d5ra09208f), 2026-05-12
Supplement: d5ra09208f1.pdf [file d5ra09208f1.pdf]

## Supporting Information

### Synthesis and antimitotic activity of 2-phenyl-6-pyridinyl-2*H*-pyrazolo[4,3-*c*]pyridines

Vaida Aleksienė,<sup>†a</sup> Eva Řezníčková,<sup>†b</sup> Aurimas Bieliauskas,<sup>a</sup> Veronika Vojáčková,<sup>b</sup> Veronika Molitorová,<sup>b</sup> Austėja Šalvytė-Nikliauzienė,<sup>c</sup> Sergey Belyakov,<sup>d</sup> Asta Žukauskaitė,<sup>e</sup> Eglė Arbačiauskienė,<sup>c</sup> Vladimír Kryštof<sup>\*b,f</sup> and Algirdas Šačkus<sup>\*a,c</sup>

<sup>a</sup> Institute of Synthetic Chemistry, Faculty of Chemical Technology, Kaunas University of Technology, K. Baršausko g. 59, LT-51423 Kaunas, Lithuania. E-mail: algirdas.sackus@ktu.lt

<sup>b</sup> Department of Experimental Biology, Faculty of Science, Palacký University, Šlechtitelů 27, CZ-77900 Olomouc, Czech Republic. E-mail: vladimir.krystof@upol.cz

<sup>c</sup> Department of Organic Chemistry, Faculty of Chemical Technology, Kaunas University of Technology, Radvilėnų pl. 19, LT-50254 Kaunas, Lithuania

<sup>d</sup> Latvian Institute of Organic Synthesis, Aizkraukles 21, LV-1006 Riga, Latvia

<sup>e</sup> Department of Chemical Biology, Faculty of Science, Palacký University, Šlechtitelů 27, CZ-77900 Olomouc, Czech Republic

<sup>f</sup> Institute of Molecular and Translational Medicine, Faculty of Medicine and Dentistry, Palacký University, Hněvotínská 5, CZ-77900 Olomouc, Czech Republic

† Vaida Aleksienė and Eva Řezníčková contributed equally to this work

\* Correspondence:

Algirdas Šačkus  
algirdas.sackus@ktu.lt

Vladimír Kryštof  
vladimir.krystof@upol.cz

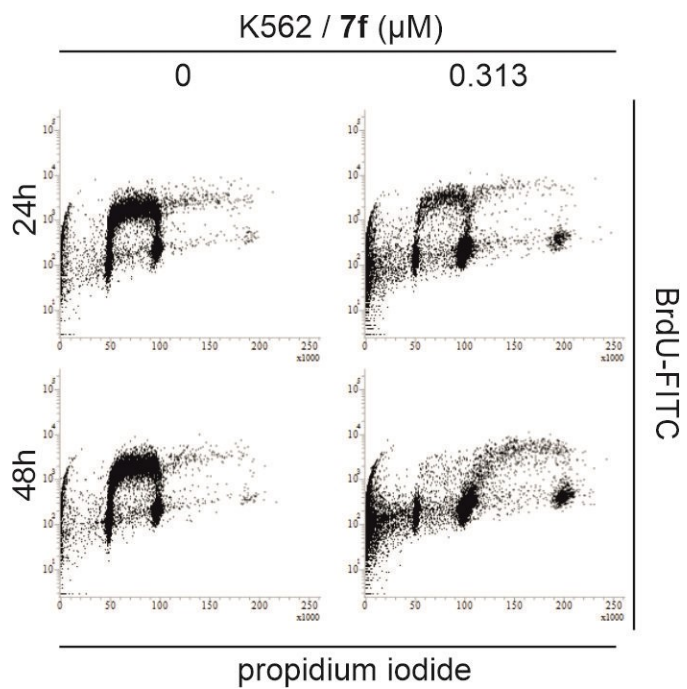

**Figure S1.** Analysis of cellular proliferation using BrdU incorporation in K562 cells treated with **7f** for 24 and 48 h

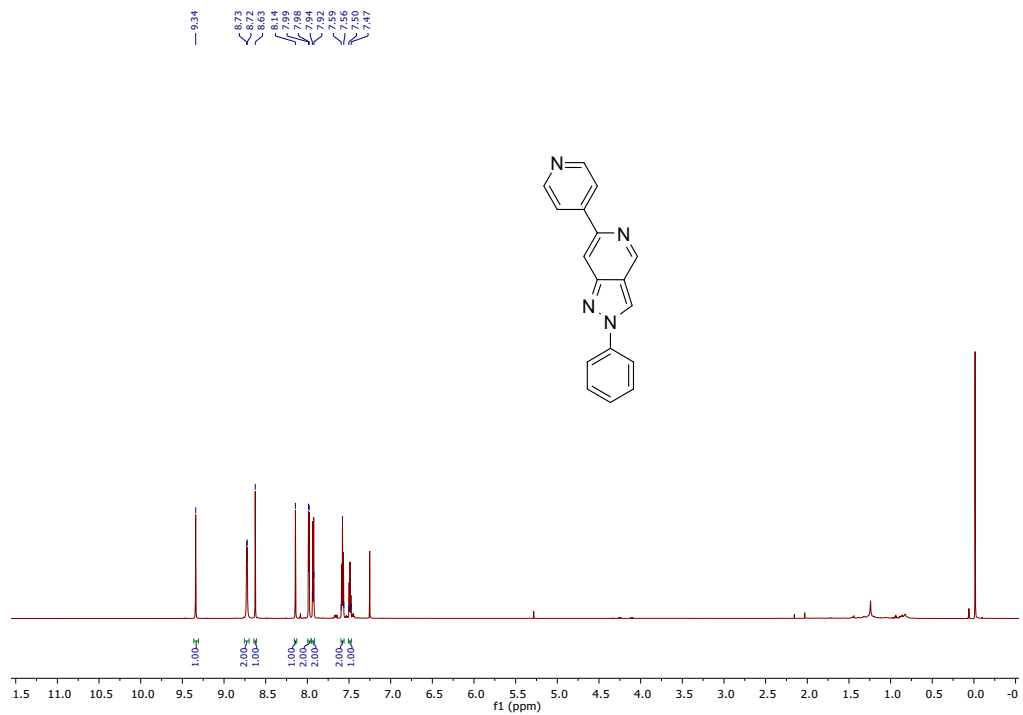

**Figure S2.** <sup>1</sup>H NMR spectrum (700 MHz, CDCl<sub>3</sub>) of 2-phenyl-6-(pyridin-4-yl)-2H-pyrazolo[4,3-c]pyridine (7a)

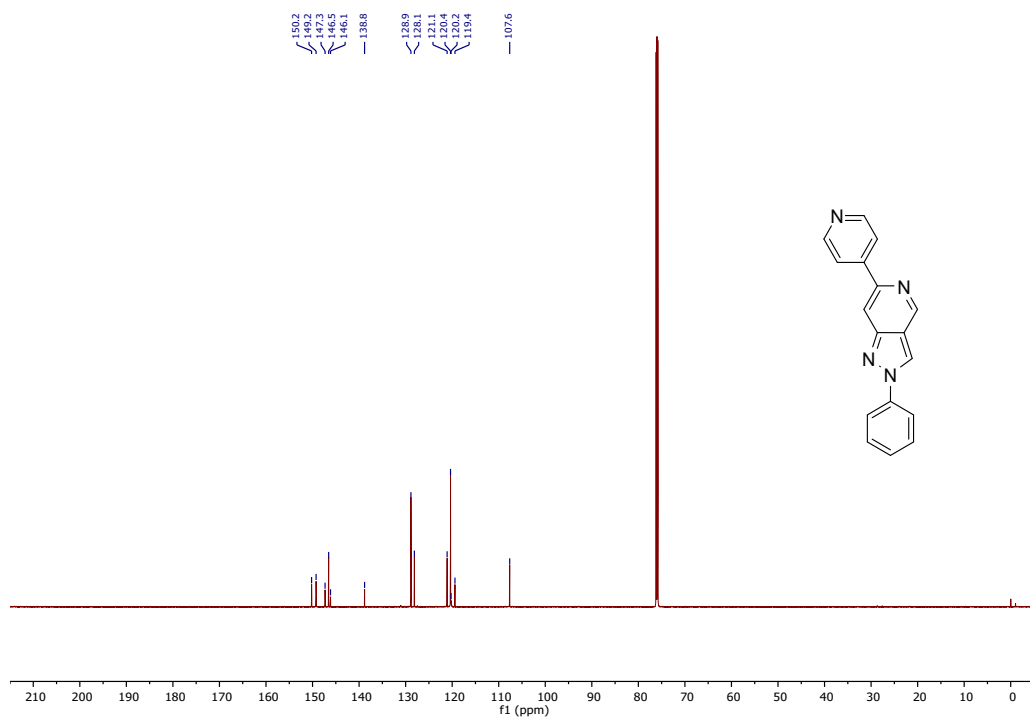

**Figure S3.** <sup>13</sup>C NMR spectrum (176 MHz, CDCl<sub>3</sub>) of 2-phenyl-6-(pyridin-4-yl)-2H-pyrazolo[4,3-c]pyridine (7a)

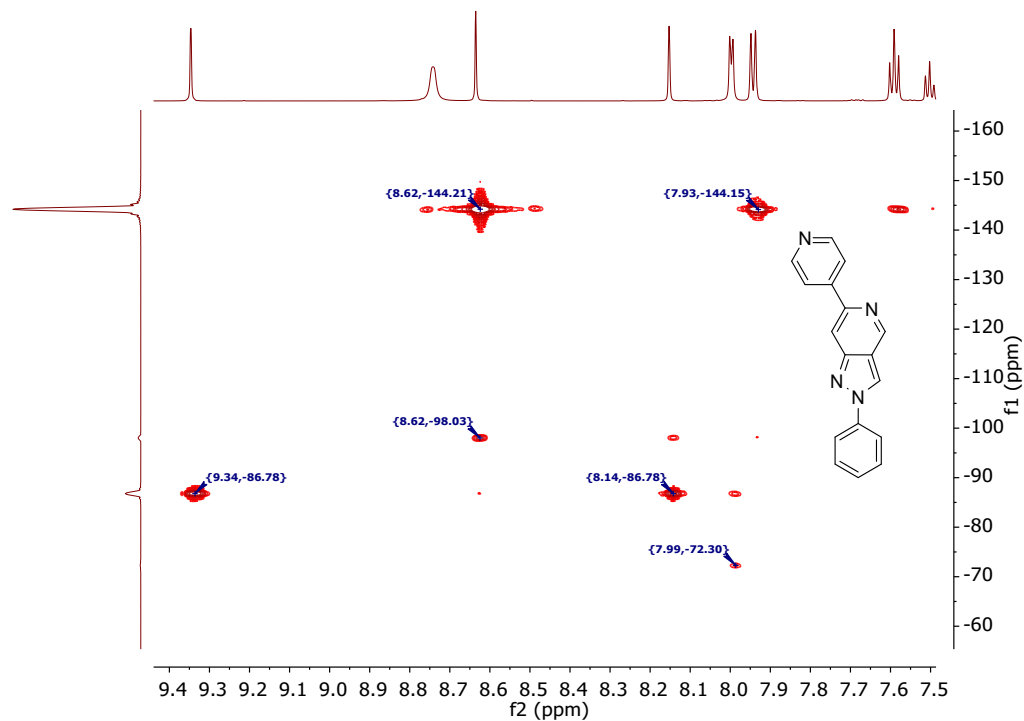

**Figure S4.**  $^1\text{H}$ - $^{15}\text{N}$  HMBC NMR spectrum (71 MHz,  $\text{CDCl}_3$ ) of 2-phenyl-6-(pyridin-4-yl)-2H-pyrazolo[4,3-c]pyridine (**7a**)

+MS, 10.2min #610

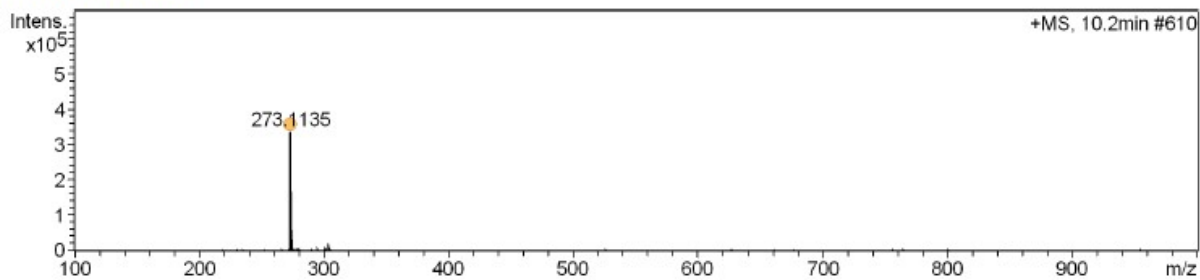

| Meas. m/z | # | Ion Formula                                    | m/z      | err [ppm] | mSigma | # Sigma | Score  | rdb  | e <sup>-</sup> Conf | N-Rule |
|-----------|---|------------------------------------------------|----------|-----------|--------|---------|--------|------|---------------------|--------|
| 273.1135  | 1 | C <sub>17</sub> H <sub>13</sub> N <sub>4</sub> | 273.1135 | -0.1      | 8.7    | 1       | 100.00 | 13.5 | even                | ok     |

**Figure S5.** HRMS (ESI) report of **7a**

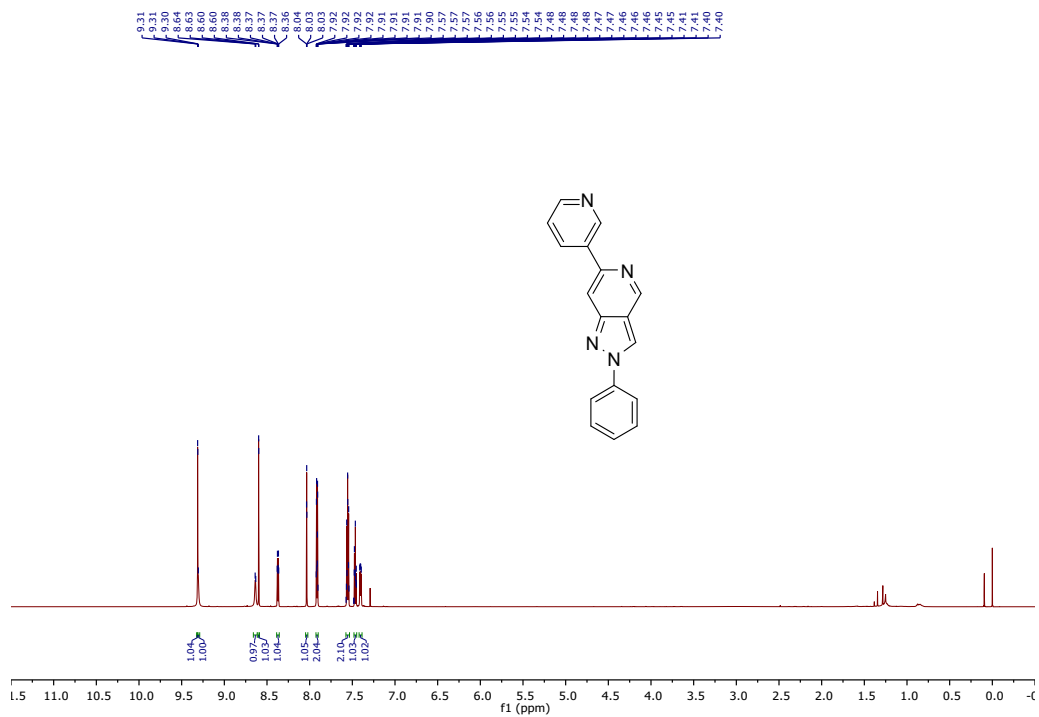

**Figure S6.** <sup>1</sup>H NMR spectrum (700 MHz, CDCl<sub>3</sub>) of 2-phenyl-6-(pyridin-3-yl)-2H-pyrazolo[4,3-c]pyridine (**7b**)

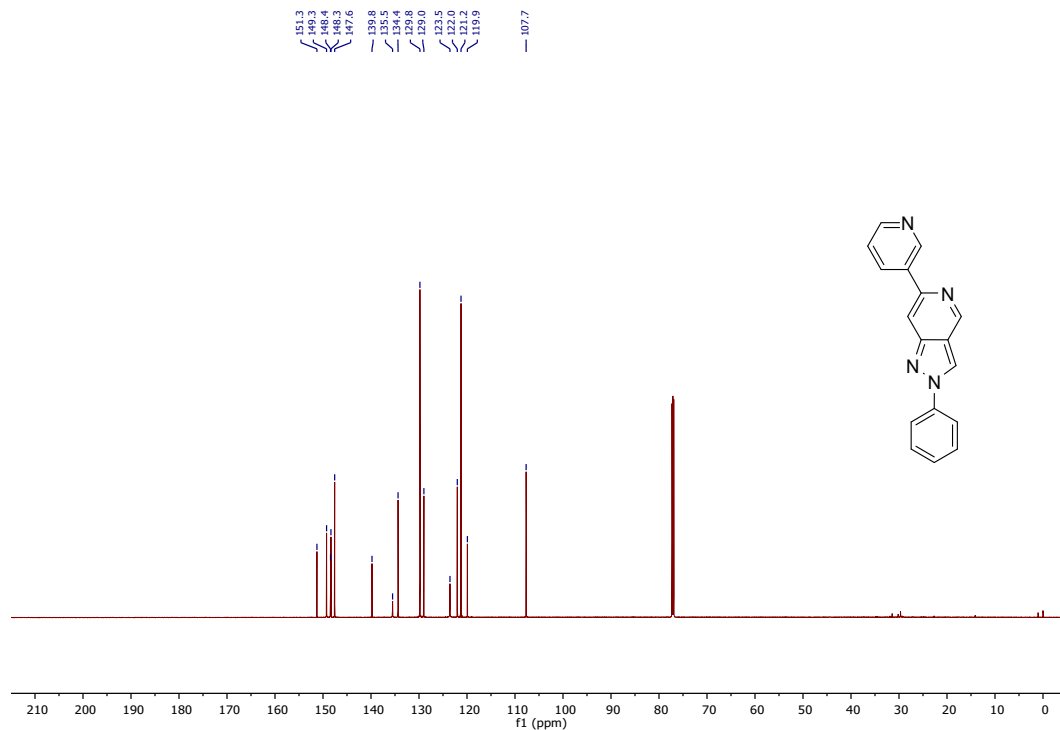

**Figure S7.** <sup>13</sup>C NMR spectrum (176 MHz, CDCl<sub>3</sub>) of 2-phenyl-6-(pyridin-3-yl)-2H-pyrazolo[4,3-c]pyridine (**7b**)

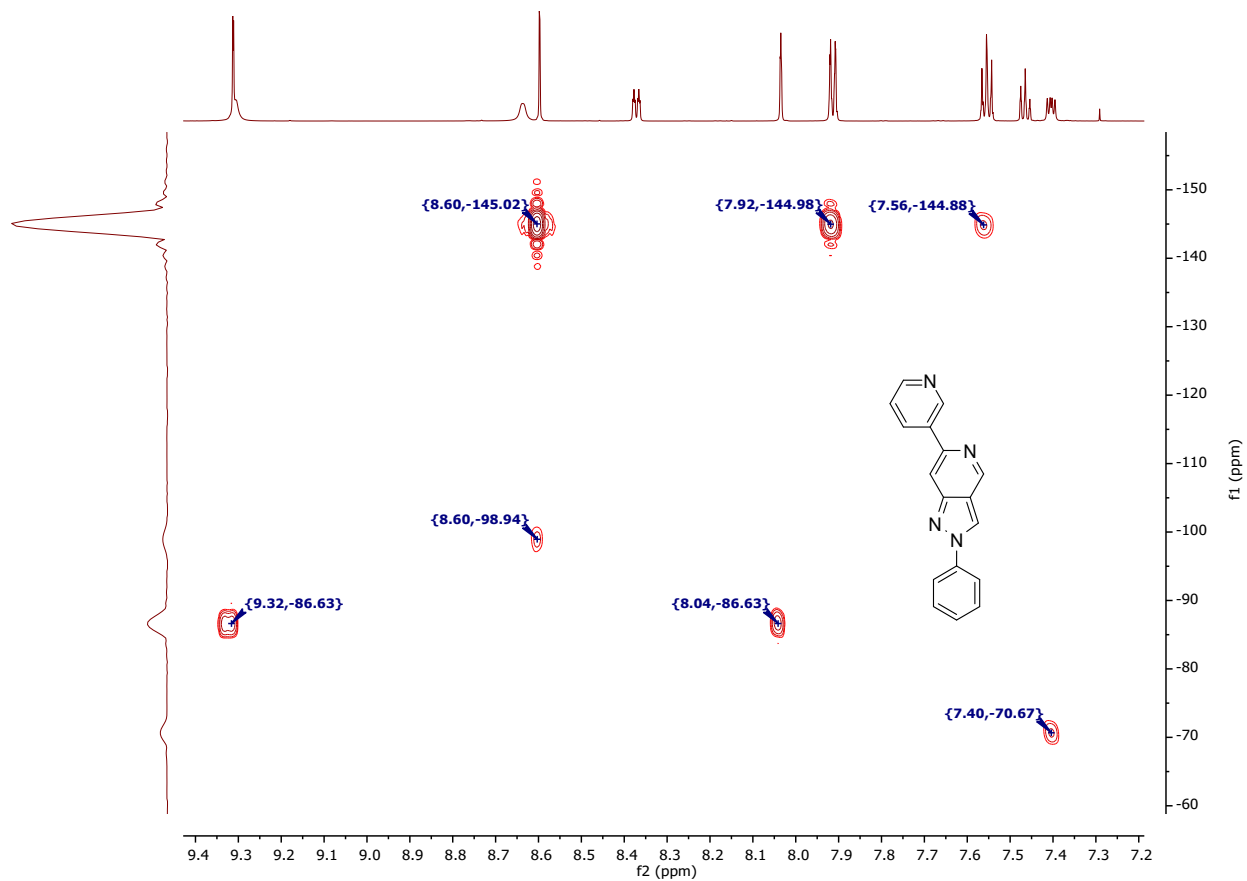

**Figure S8.**  $^1\text{H}$ - $^{15}\text{N}$  HMBC NMR spectrum (71 MHz,  $\text{CDCl}_3$ ) of 2-phenyl-6-(pyridin-3-yl)-2H-pyrazolo[4,3-c]pyridine (**7b**)

+MS, 4.5min #272

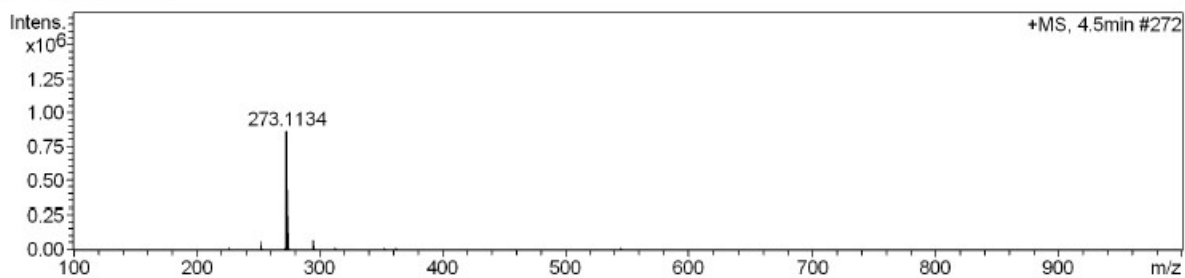

| Meas. m/z | # | Ion Formula                                    | m/z      | err [ppm] | mSigma | # Sigma | Score  | rdb  | e <sup>-</sup> Conf | N-Rule |
|-----------|---|------------------------------------------------|----------|-----------|--------|---------|--------|------|---------------------|--------|
| 273.1134  | 1 | C <sub>17</sub> H <sub>13</sub> N <sub>4</sub> | 273.1135 | 0.4       | 52.7   | 1       | 100.00 | 13.5 | even                | ok     |

**Figure S9.** HRMS (ESI) report of **7b**

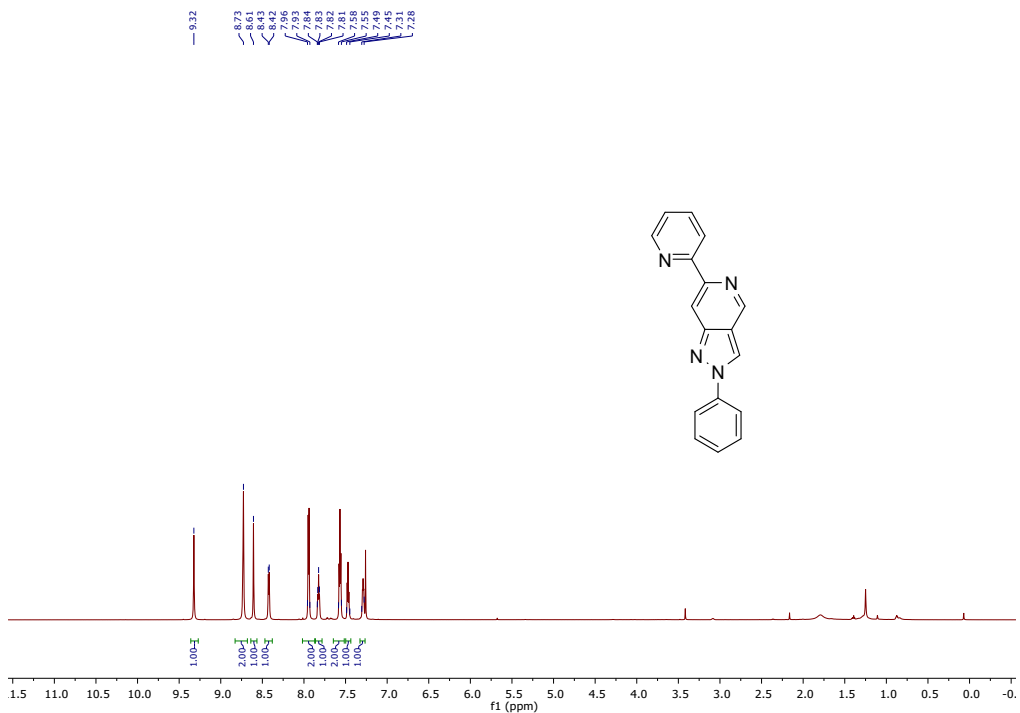

**Figure S10.** <sup>1</sup>H NMR spectrum (700 MHz, CDCl<sub>3</sub>) of 2-phenyl-6-(pyridin-2-yl)-2H-pyrazolo[4,3-c]pyridine (7c)

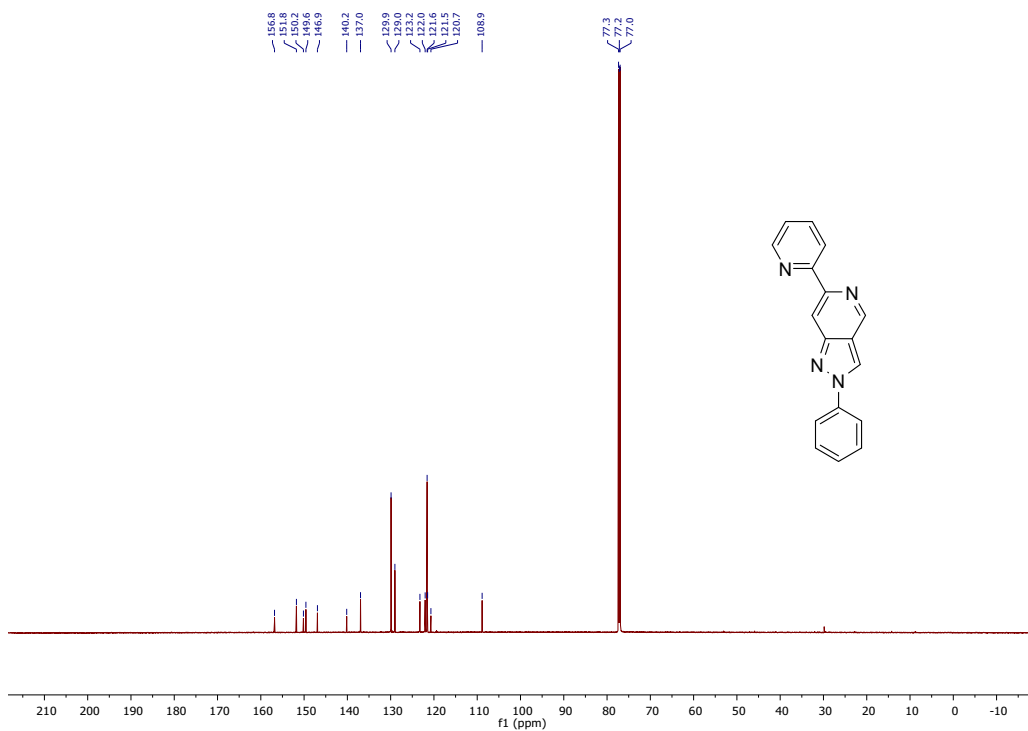

**Figure S11.** <sup>13</sup>C NMR spectrum (176 MHz, CDCl<sub>3</sub>) of 2-phenyl-6-(pyridin-2-yl)-2H-pyrazolo[4,3-c]pyridine (7c)

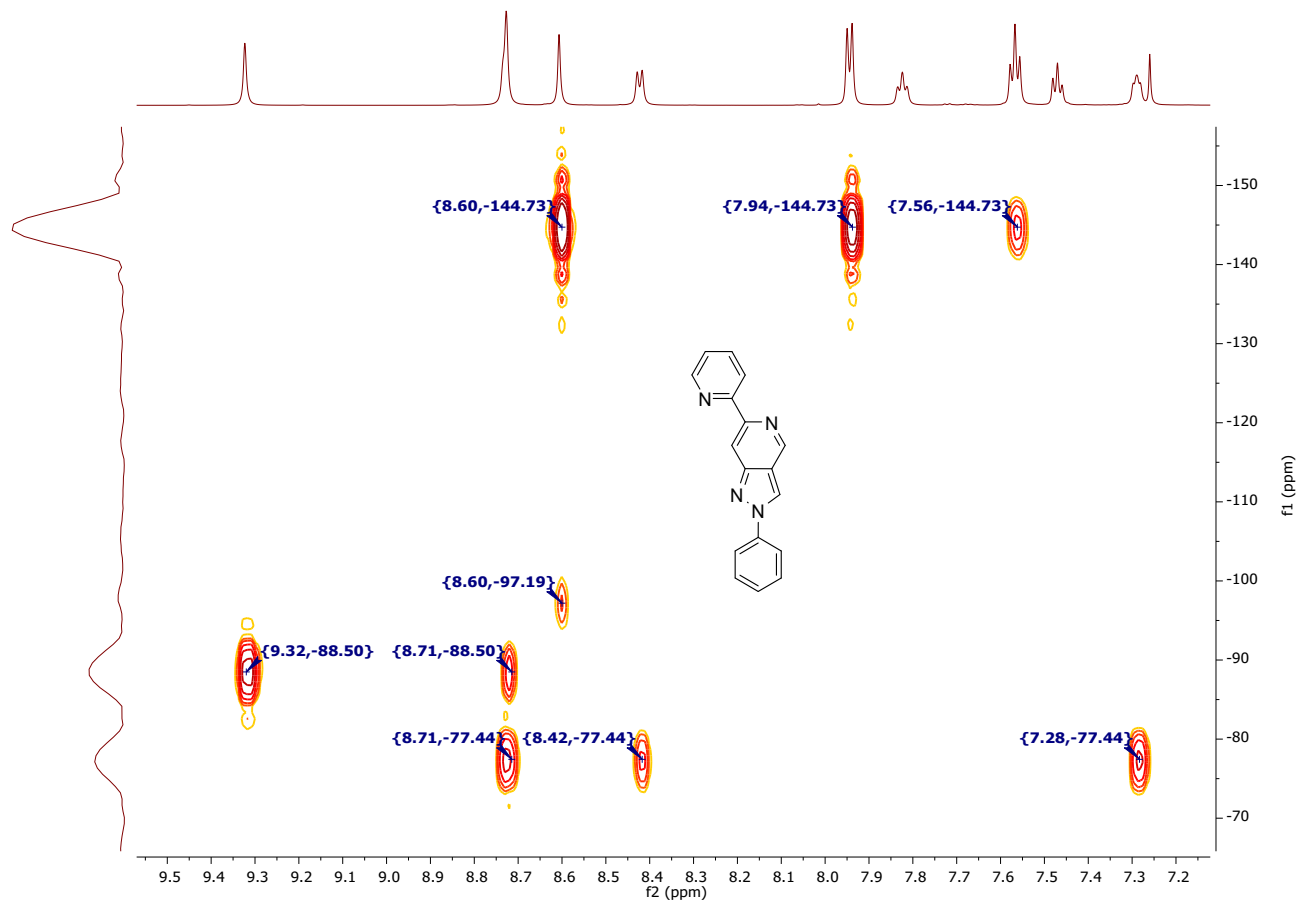

**Figure S12.**  $^1\text{H}$ - $^{15}\text{N}$  HMBC NMR spectrum (71 MHz,  $\text{CDCl}_3$ ) of 2-phenyl-6-(pyridin-2-yl)-2H-pyrazolo[4,3-c]pyridine (**7c**)

+MS, 6.5min #388

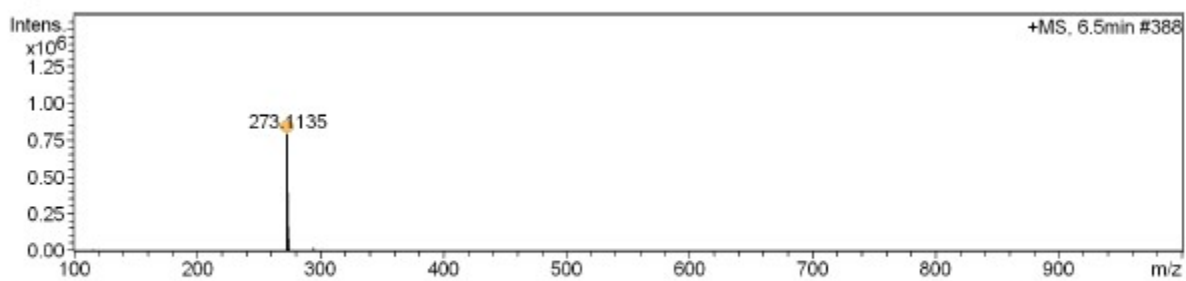

| Meas. m/z | # | Ion Formula                                    | m/z      | err [ppm] | mSigma | # Sigma | Score  | rdb  | e <sup>-</sup> Conf | N-Rule |
|-----------|---|------------------------------------------------|----------|-----------|--------|---------|--------|------|---------------------|--------|
| 273.1135  | 1 | C <sub>17</sub> H <sub>13</sub> N <sub>4</sub> | 273.1135 | -0.1      | 8.0    | 1       | 100.00 | 13.5 | even                | ok     |

**Figure S13.** HRMS (ESI) report of **7c**

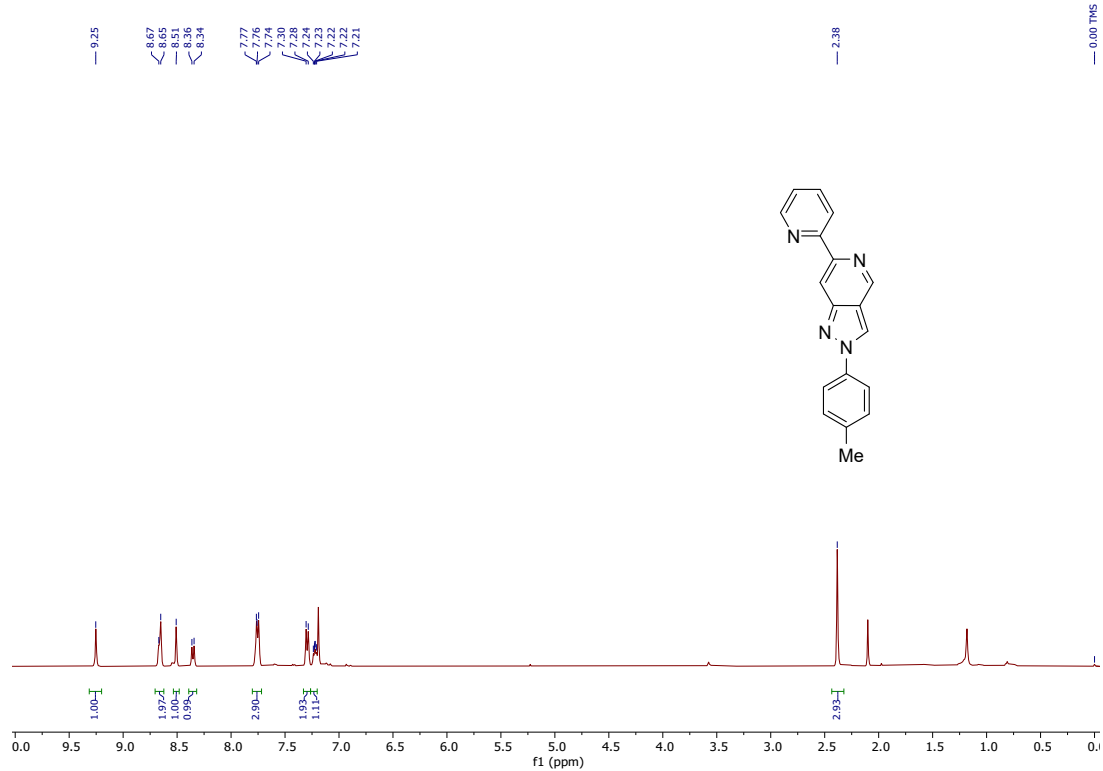

**Figure S14.** <sup>1</sup>H NMR spectrum (400 MHz, CDCl<sub>3</sub>) of 2-(4-methylphenyl)-6-(pyridin-2-yl)-2H-pyrazolo[4,3-c]pyridine (**7d**)

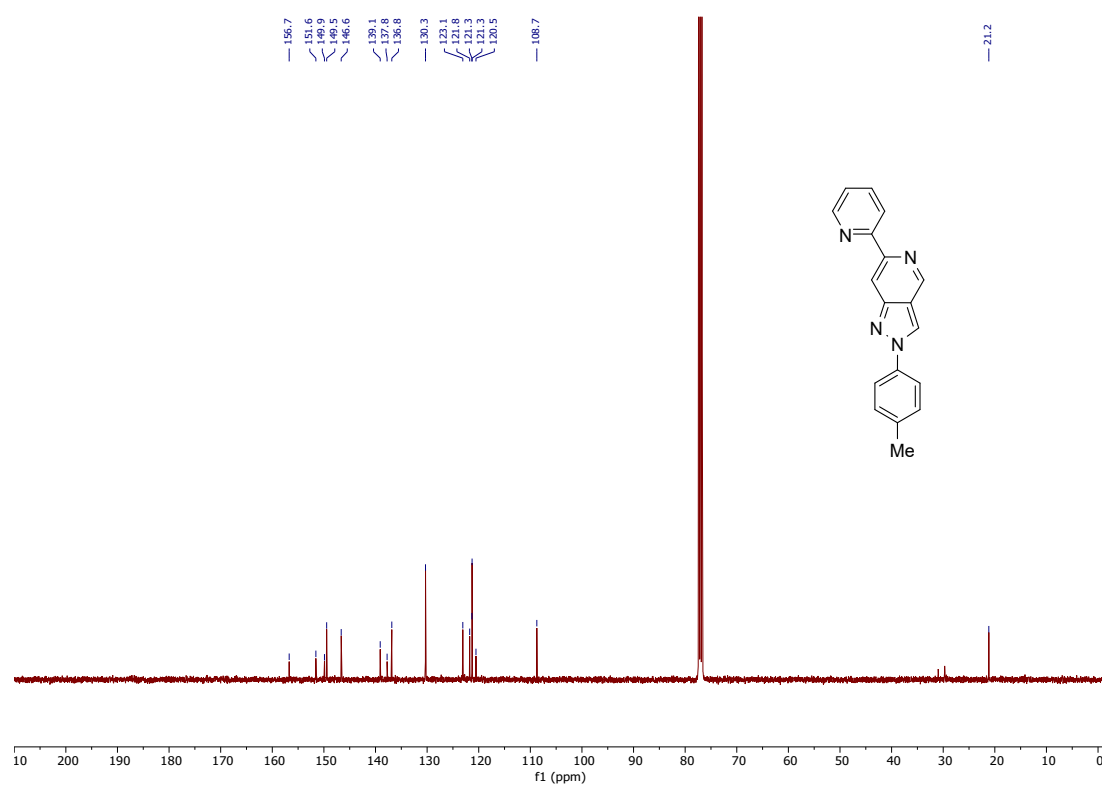

**Figure S15.**  $^{13}\text{C}$  NMR spectrum (101 MHz,  $\text{CDCl}_3$ ) of 2-(4-methylphenyl)-6-(pyridin-2-yl)-2H-pyrazolo[4,3-c]pyridine (**7d**)

+MS, 5.1min #303

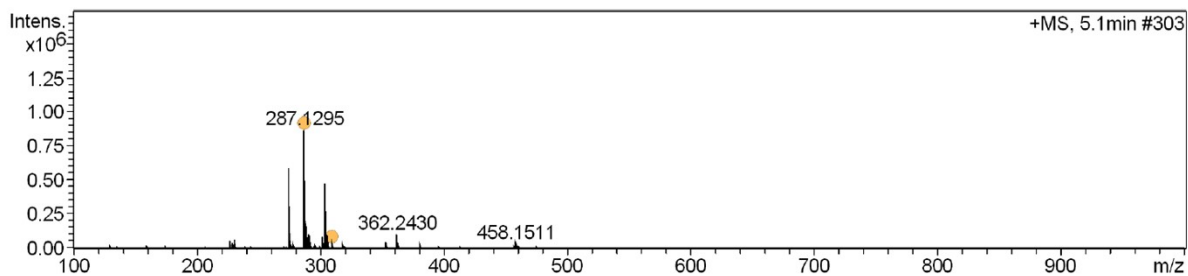

| Meas. m/z | # | Ion Formula                                       | m/z      | err [ppm] | mSigma | # Sigma | Score  | rdb  | e <sup>-</sup> Conf | N-Rule |
|-----------|---|---------------------------------------------------|----------|-----------|--------|---------|--------|------|---------------------|--------|
| 287.1295  | 1 | C <sub>18</sub> H <sub>15</sub> N <sub>4</sub>    | 287.1291 | 1.3       | 12.7   | 1       | 100.00 | 13.5 | even                | ok     |
| 309.1102  | 1 | C <sub>18</sub> H <sub>14</sub> N <sub>4</sub> Na | 309.1111 | -2.9      | 30.1   | 1       | 100.00 | 13.5 | even                | ok     |

**Figure S16.** HRMS (ESI) report of **7d**

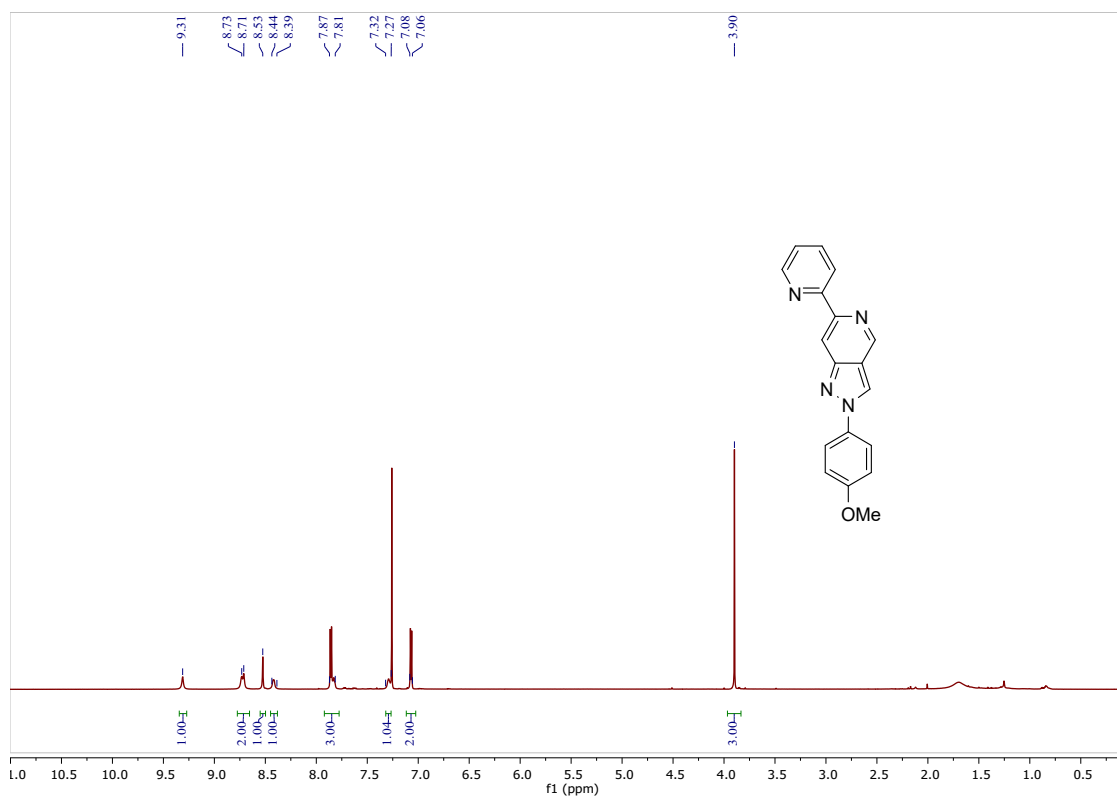

**Figure S17.**  $^1\text{H}$  NMR spectrum (700 MHz,  $\text{CDCl}_3$ ) of 2-(4-methoxyphenyl)-6-(pyridin-2-yl)-2H-pyrazolo[4,3-c]pyridine (**7e**)

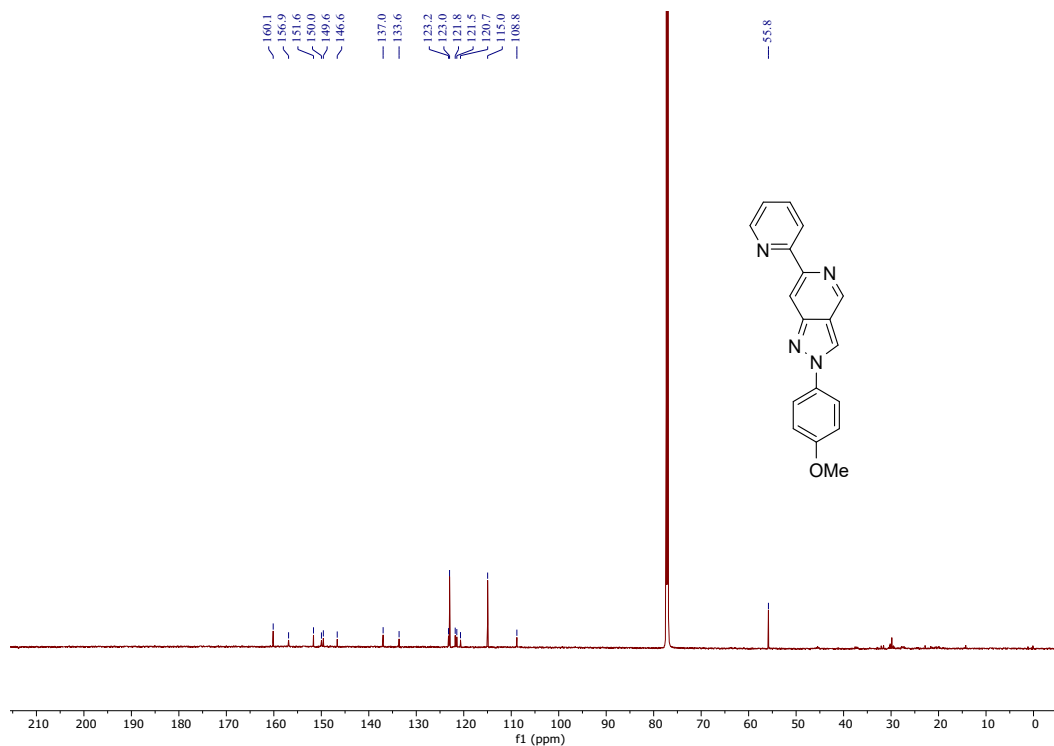

**Figure S18.**  $^{13}\text{C}$  NMR spectrum (176 MHz,  $\text{CDCl}_3$ ) of 2-(4-methoxyphenyl)-6-(pyridin-2-yl)-2H-pyrazolo[4,3-c]pyridine (**7e**)

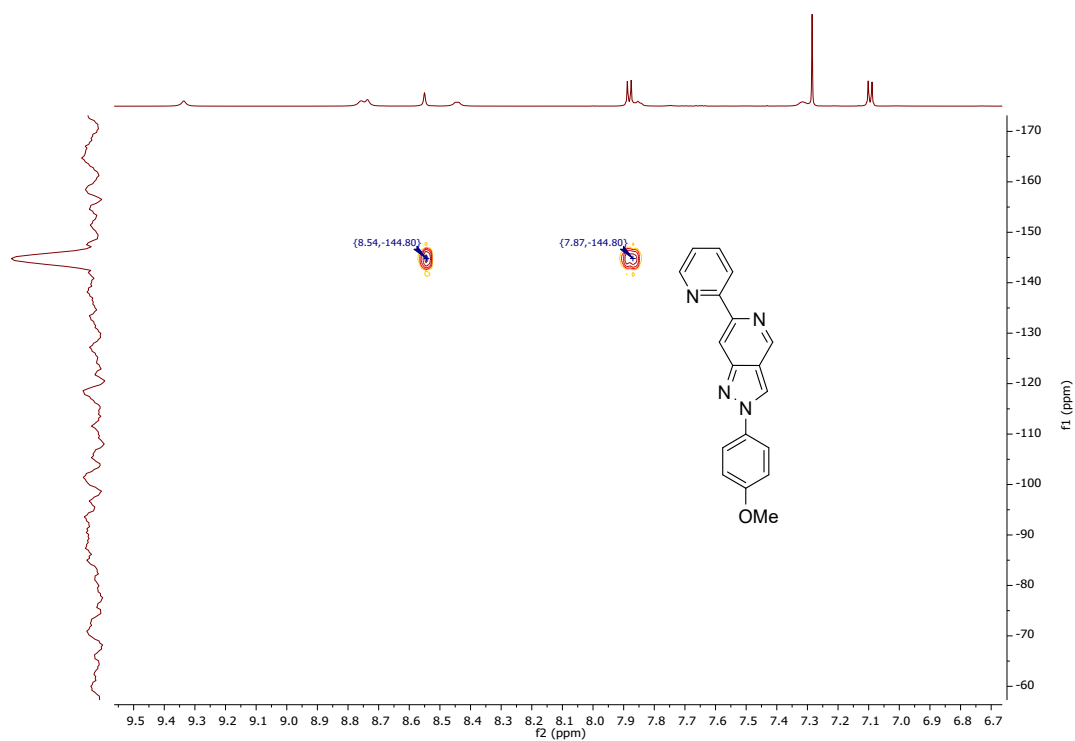

**Figure S19.**  $^1\text{H}$ - $^{15}\text{N}$  HMBC NMR spectrum (71 MHz,  $\text{CDCl}_3$ ) of 2-(4-methoxyphenyl)-6-(pyridin-2-yl)-2H-pyrazolo[4,3-c]pyridine (**7e**)

+MS, 6.9min #416

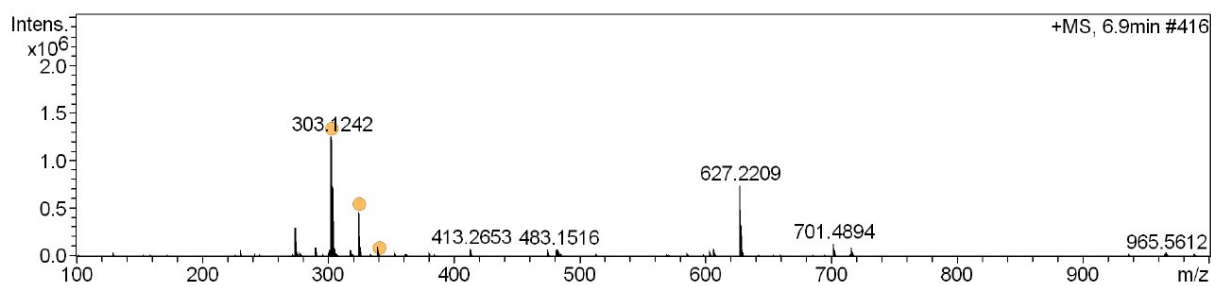

| Meas. m/z | # | Ion Formula | m/z      | err [ppm] | mSigma | # Sigma | Score  | rdb  | e <sup>-</sup> Conf | N-Rule |
|-----------|---|-------------|----------|-----------|--------|---------|--------|------|---------------------|--------|
| 303.1242  | 1 | C18H15N4O   | 303.1240 | 0.4       | 217.5  | 1       | 100.00 | 13.5 | even                | ok     |
| 325.1057  | 1 | C18H14N4NaO | 325.1060 | 0.8       | 2.1    | 1       | 100.00 | 13.5 | even                | ok     |
| 341.0822  | 1 | C18H14KN4O  | 341.0799 | -6.7      | 26.4   | 1       | 100.00 | 13.5 | even                | ok     |

Figure S20. HRMS (ESI) report of 7e

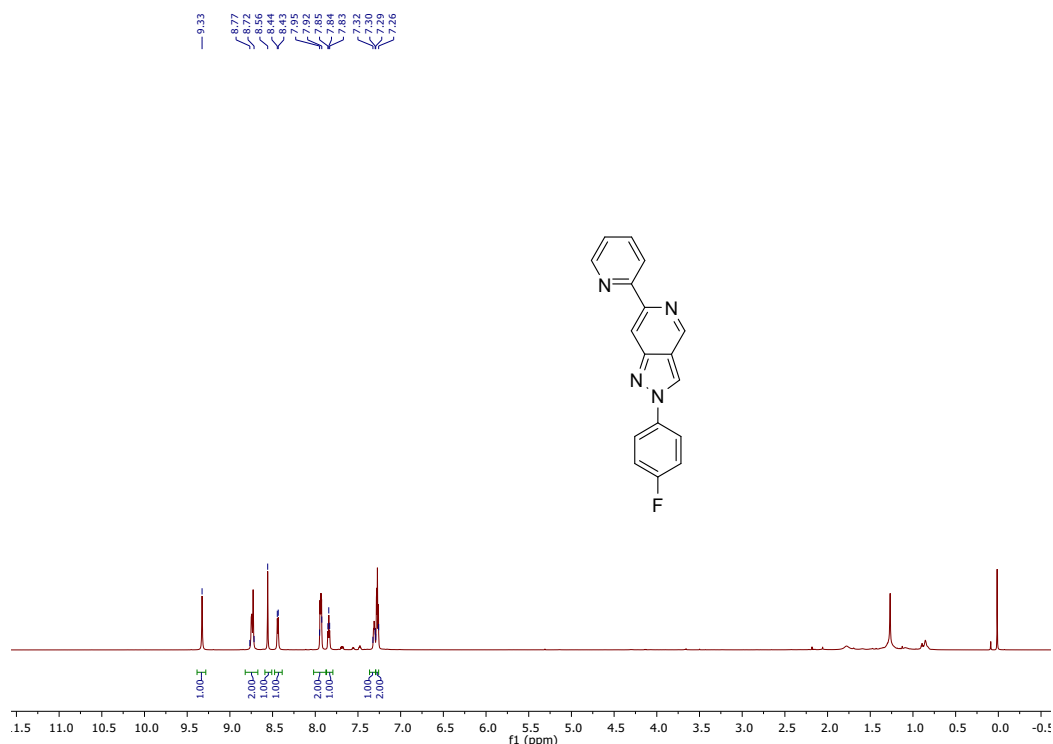

Figure S21. <sup>1</sup>H NMR spectrum (700 MHz, CDCl<sub>3</sub>) of 2-(4-fluorophenyl)-6-(pyridin-2-yl)-2H-pyrazolo[4,3-c]pyridine (7f)

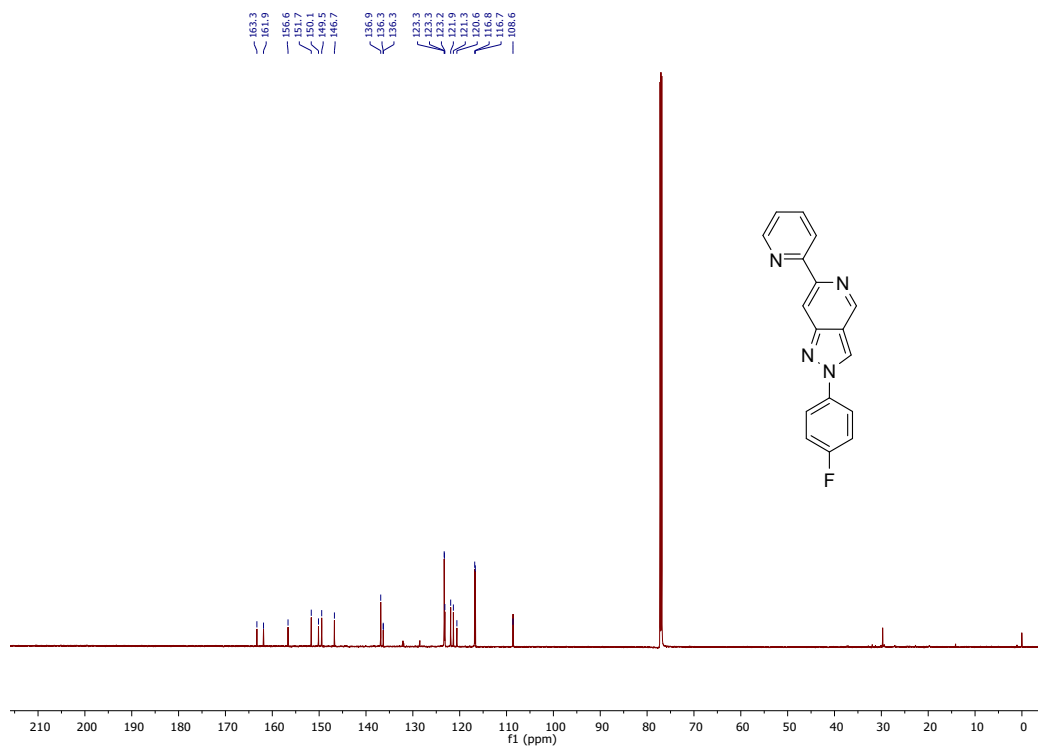

**Figure S22.**  $^{13}\text{C}$  NMR spectrum (176 MHz,  $\text{CDCl}_3$ ) of 2-(4-fluorophenyl)-6-(pyridin-2-yl)-2H-pyrazolo[4,3-c]pyridine (**7f**)

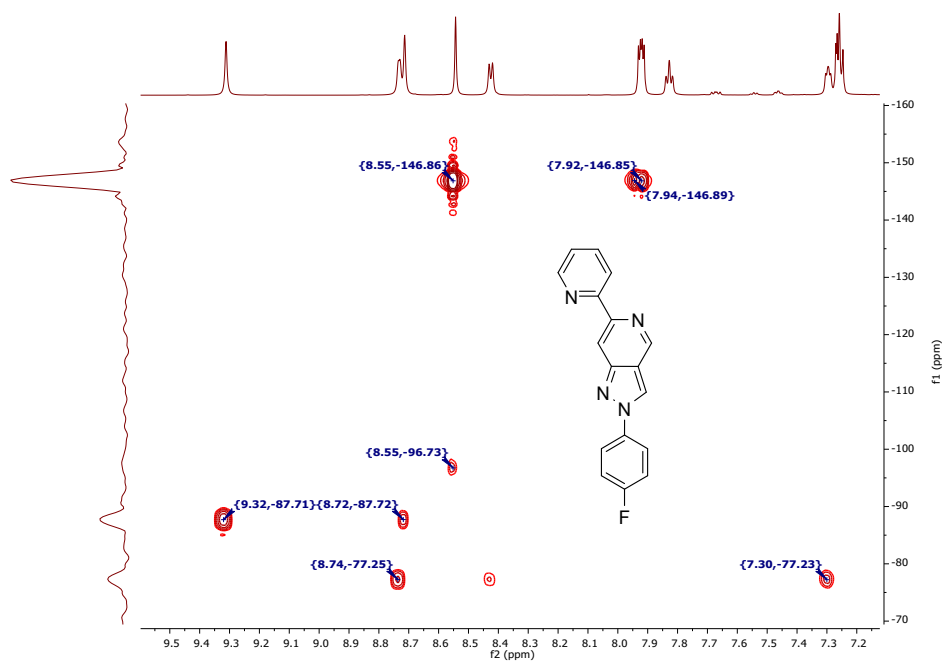

**Figure S23.**  $^1\text{H}$ - $^{15}\text{N}$  HMBC NMR spectrum (71 MHz,  $\text{CDCl}_3$ ) of 2-(4-fluorophenyl)-6-(pyridin-2-yl)-2H-pyrazolo[4,3-c]pyridine (**7f**)

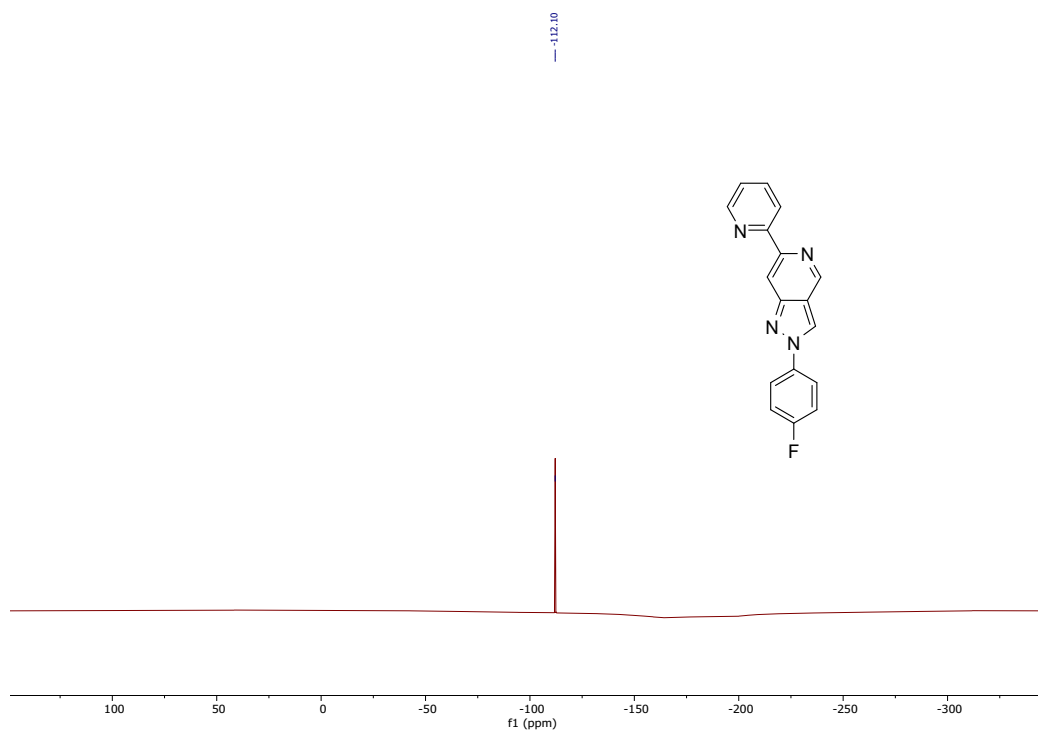

**Figure S24.**  $^{19}\text{F}$  NMR spectrum (376 MHz,  $\text{CDCl}_3$ ) of 2-(4-fluorophenyl)-6-(pyridin-2-yl)-2H-pyrazolo[4,3-c]pyridine (**7f**)

+MS, 12.1min #724

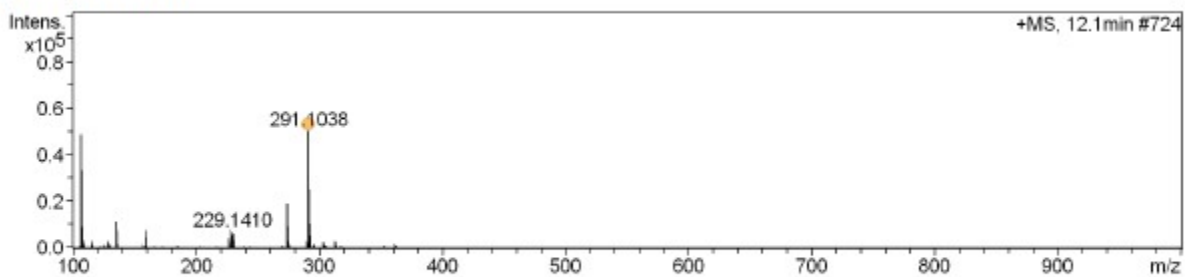

| Meas. m/z | # | Ion Formula                                     | m/z      | err [ppm] | mSigma | # Sigma | Score  | rdb  | e <sup>-</sup> Conf | N-Rule |
|-----------|---|-------------------------------------------------|----------|-----------|--------|---------|--------|------|---------------------|--------|
| 291.1038  | 1 | C <sub>17</sub> H <sub>12</sub> FN <sub>4</sub> | 291.1041 | 1.0       | 6.5    | 2       | 100.00 | 13.5 | even                | ok     |

**Figure S25.** HRMS (ESI) report of **7f**

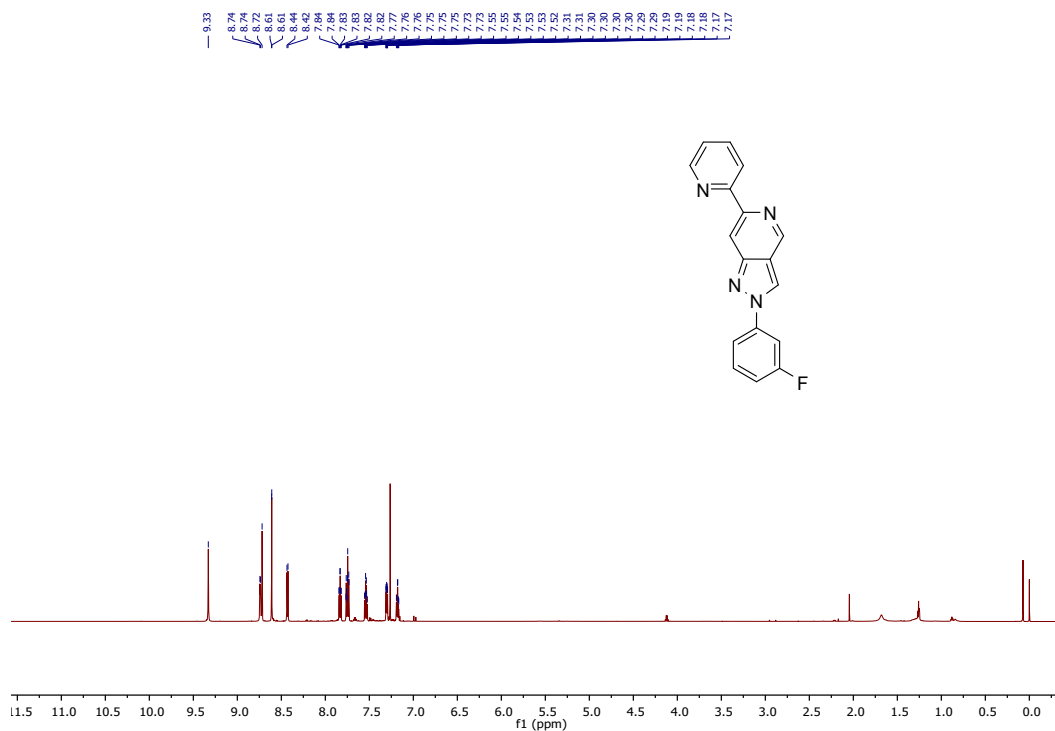

**Figure S26.** <sup>1</sup>H NMR spectrum (700 MHz, CDCl<sub>3</sub>) of 2-(3-fluorophenyl)-6-(pyridin-2-yl)-2H-pyrazolo[4,3-c]pyridine (**7g**)

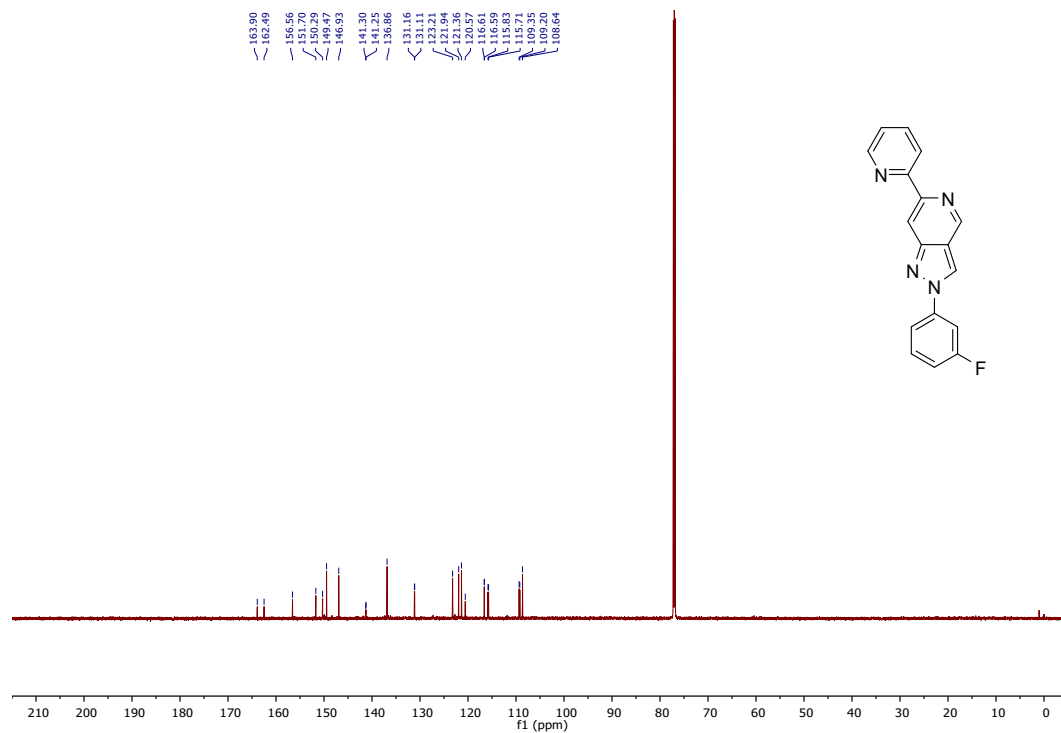

**Figure S27.** <sup>13</sup>C NMR spectrum (176 MHz, CDCl<sub>3</sub>) of 2-(3-fluorophenyl)-6-(pyridin-2-yl)-2H-pyrazolo[4,3-c]pyridine (**7g**)

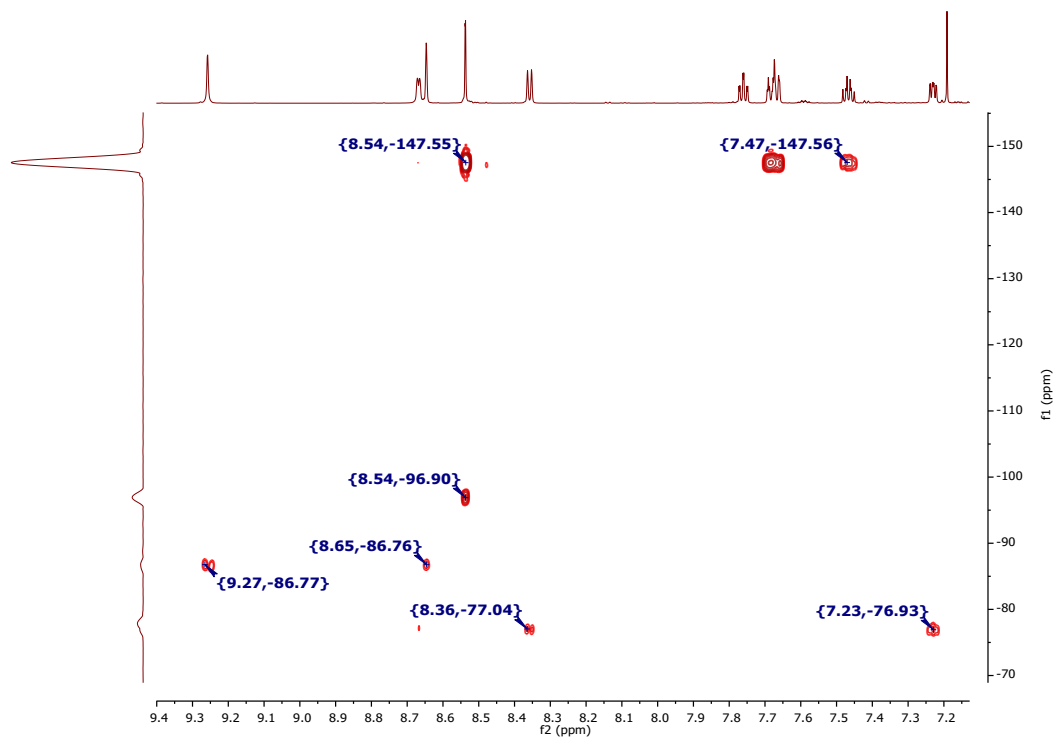

**Figure S28.**  $^1\text{H}$ - $^{15}\text{N}$  HMBC NMR spectrum (71 MHz,  $\text{CDCl}_3$ ) of 2-(3-fluorophenyl)-6-(pyridin-2-yl)-2*H*-pyrazolo[4,3-*c*]pyridine (**7g**)

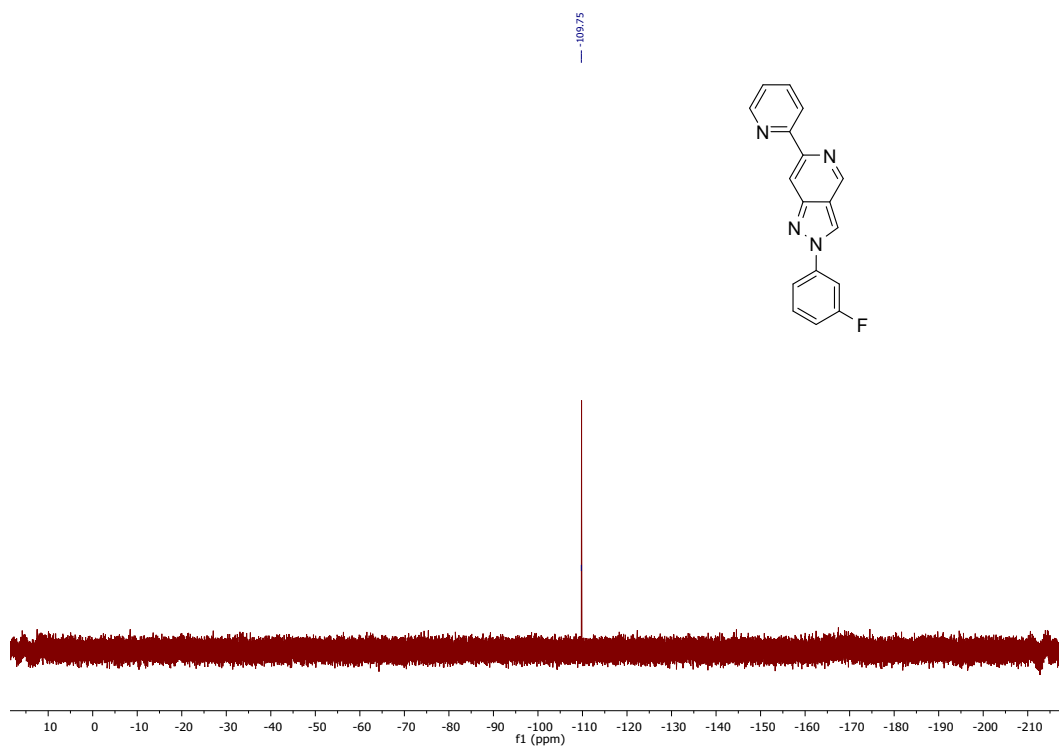

**Figure S29.**  $^{19}\text{F}$  NMR spectrum (376 MHz,  $\text{CDCl}_3$ ) of 2-(3-fluorophenyl)-6-(pyridin-2-yl)-2*H*-pyrazolo[4,3-*c*]pyridine (**7g**)

+MS, 4.4min #261

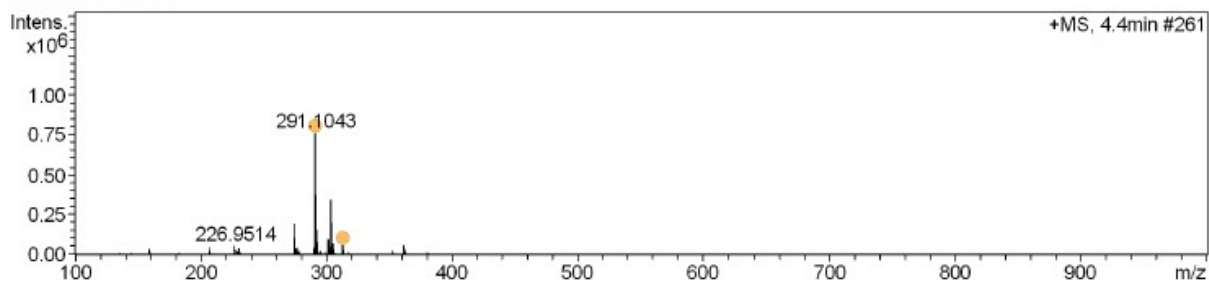

| Meas. m/z | # | Ion Formula | m/z      | err [ppm] | mSigma | # Sigma | Score  | rdb  | e <sup>-</sup> Conf | N-Rule |
|-----------|---|-------------|----------|-----------|--------|---------|--------|------|---------------------|--------|
| 291.1043  | 1 | C17H12FN4   | 291.1041 | -0.8      | 9.0    | 1       | 100.00 | 13.5 | even                | ok     |
| 313.0857  | 1 | C17H11FN4Na | 313.0860 | 0.8       | 3.0    | 1       | 100.00 | 13.5 | even                | ok     |

Figure S30. HRMS (ESI) report of **7g**

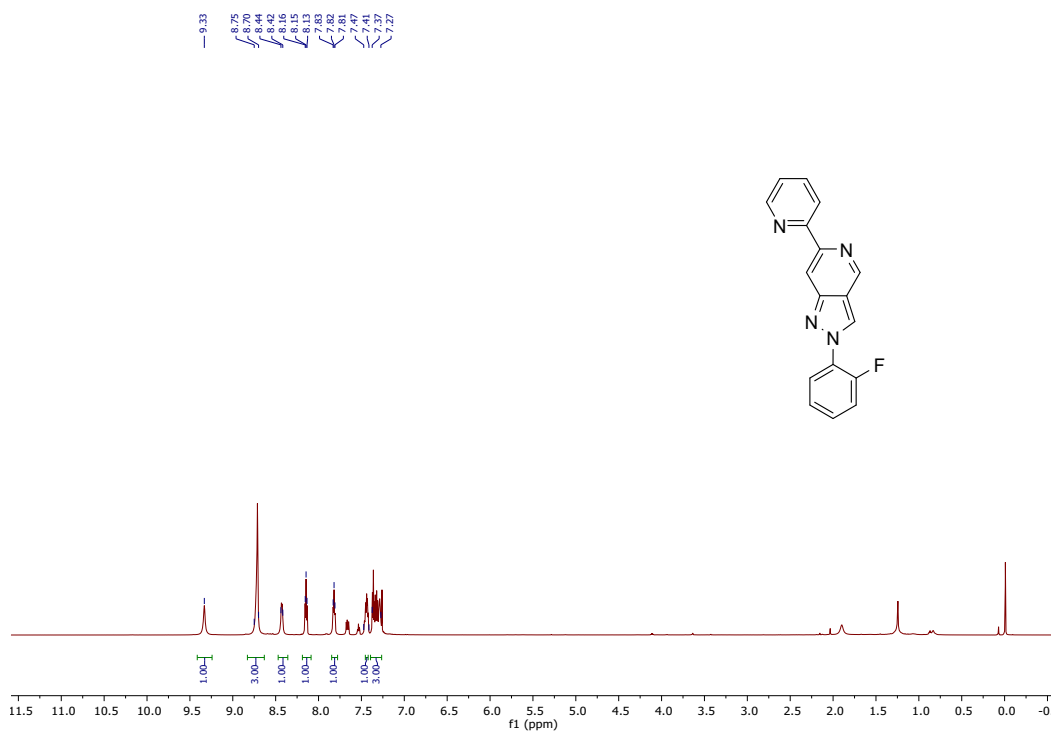

Figure S31. <sup>1</sup>H NMR spectrum (700 MHz, CDCl<sub>3</sub>) of 2-(2-fluorophenyl)-6-(pyridin-2-yl)-2H-pyrazolo[4,3-c]pyridine (**7h**)

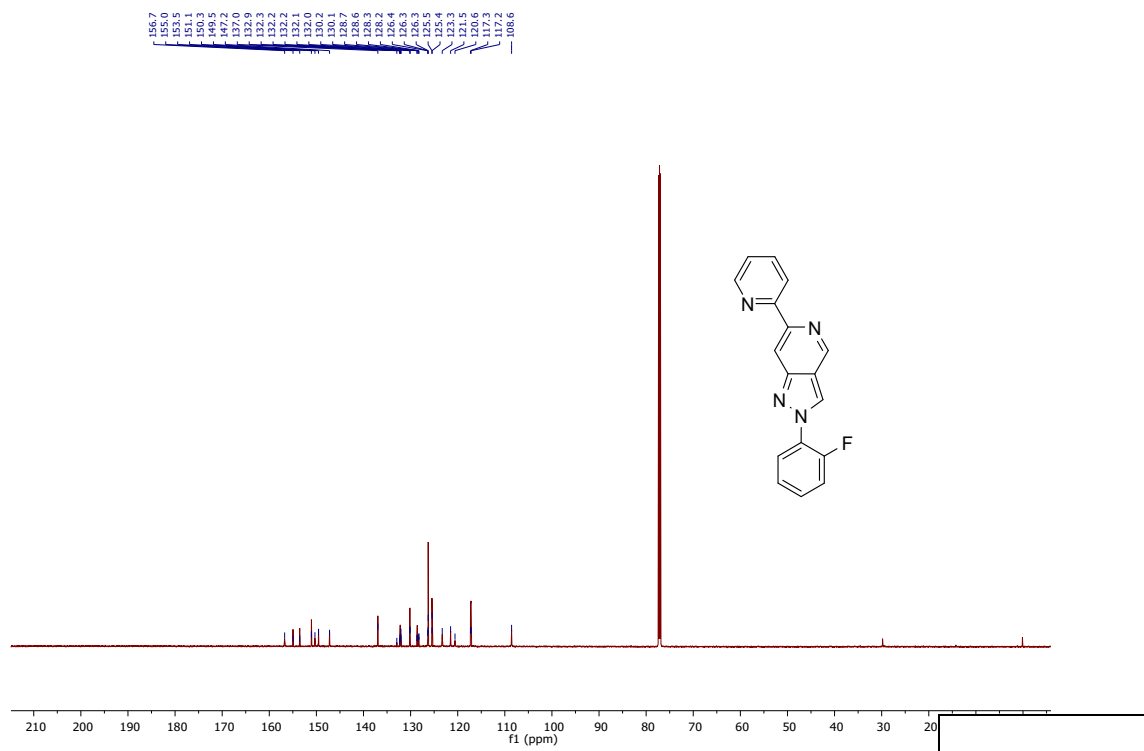

**Figure S32.**  $^{13}\text{C}$  NMR spectrum (176 MHz,  $\text{CDCl}_3$ ) of 2-(2-fluorophenyl)-6-(pyridin-2-yl)-2*H*-pyrazolo[4,3-*c*]pyridine (**7h**)

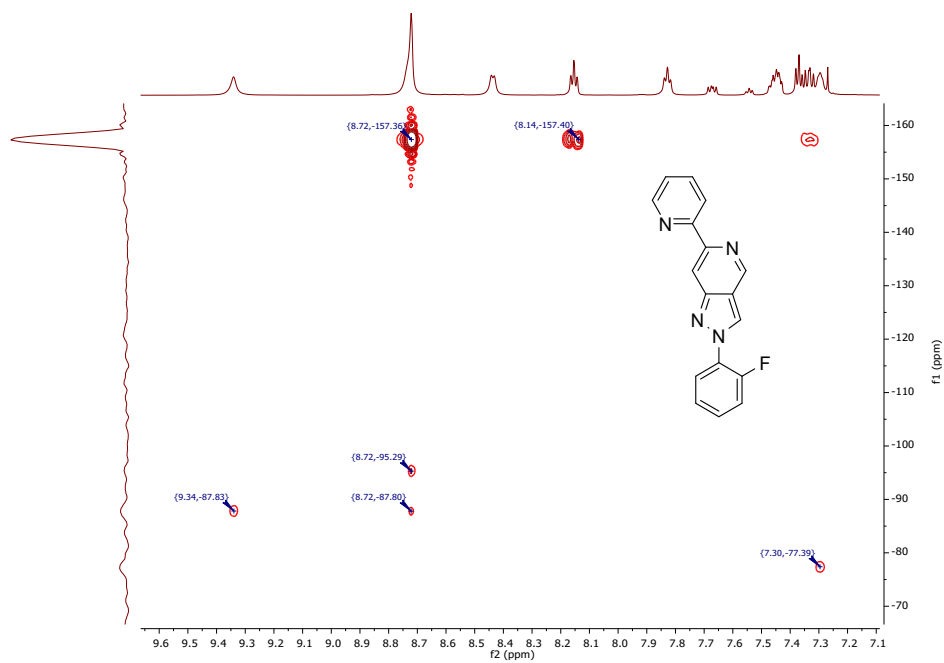

**Figure S33.**  $^1\text{H}$ - $^{15}\text{N}$  HMBC NMR spectrum (71 MHz,  $\text{CDCl}_3$ ) of 2-(2-fluorophenyl)-6-(pyridin-2-yl)-2*H*-pyrazolo[4,3-*c*]pyridine (**7h**)

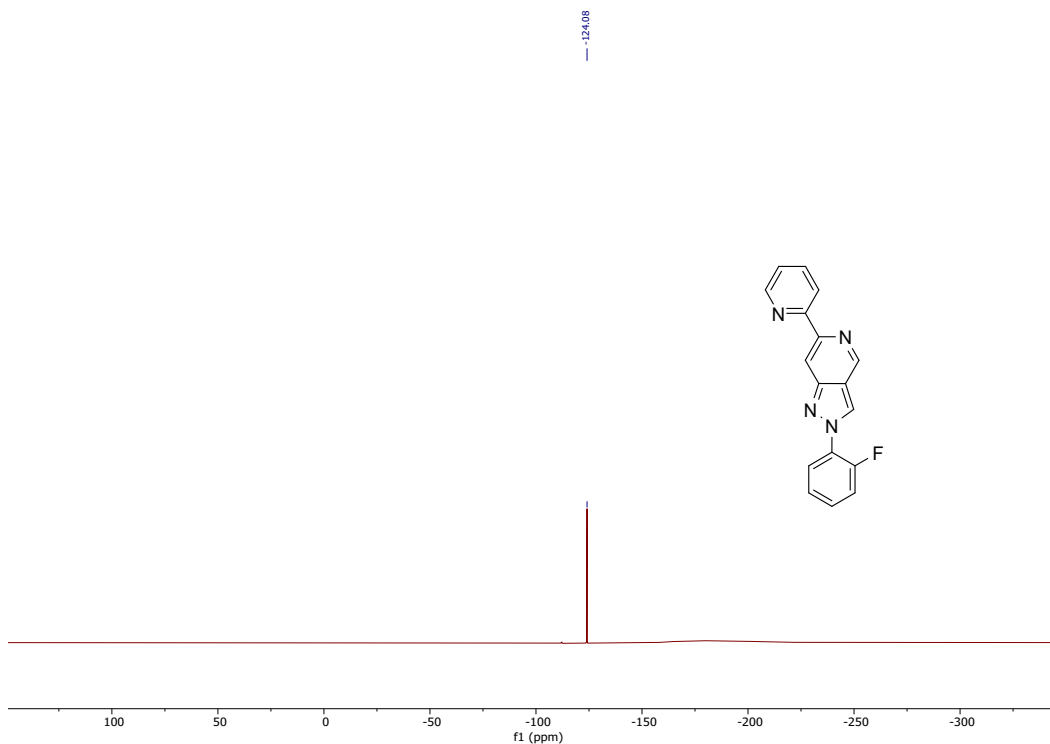

**Figure S34.**  $^{19}\text{F}$  NMR spectrum (376 MHz,  $\text{CDCl}_3$ ) of 2-(2-fluorophenyl)-6-(pyridin-2-yl)-2H-pyrazolo[4,3-c]pyridine (**7h**)

**+MS, 5.1min #304**

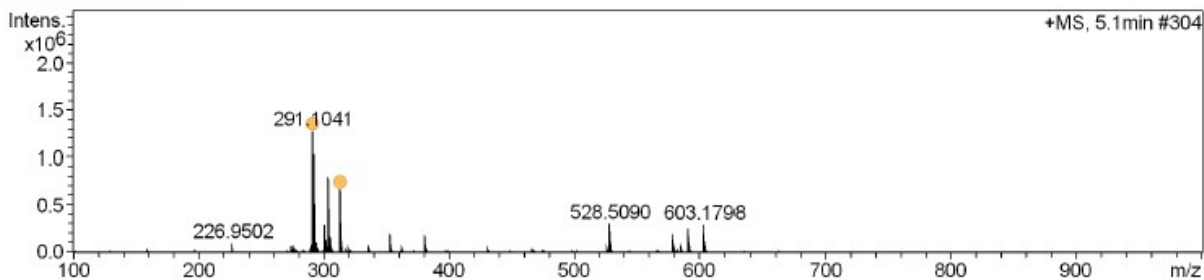

| Meas. m/z | # | Ion Formula                                        | m/z      | err [ppm] | mSigma | # Sigma | Score  | rdb  | e <sup>-</sup> Conf | N-Rule |
|-----------|---|----------------------------------------------------|----------|-----------|--------|---------|--------|------|---------------------|--------|
| 291.1041  | 1 | C <sub>17</sub> H <sub>12</sub> FN <sub>4</sub>    | 291.1041 | 0.2       | 351.4  | 1       | 100.00 | 13.5 | even                | ok     |
| 313.0855  | 1 | C <sub>17</sub> H <sub>11</sub> FN <sub>4</sub> Na | 313.0860 | -1.7      | 1.1    | 1       | 100.00 | 13.5 | even                | ok     |
|           | 1 | C <sub>17</sub> H <sub>11</sub> FN <sub>4</sub> Na | 313.0860 | -1.7      | 1.1    | 1       | 100.00 | 13.5 | even                | ok     |

**Figure S35.** HRMS (ESI) report of **7h**
